# Supplementary material for: Spinal cord injury causes chronic bone marrow failure
Source: PubMed Central journal article supplement (PMC7382469; doi:10.1038/s41467-020-17564-z), 2020-07-24
Supplement: 41467_2020_17564_MOESM1_ESM.pdf [file 41467_2020_17564_MOESM1_ESM.pdf]

## **Supplementary Information**

Spinal cord injury causes chronic bone marrow failure

Carpenter et al.

Contents:  
Supplementary Figures 1-2  
Supplementary Table 1

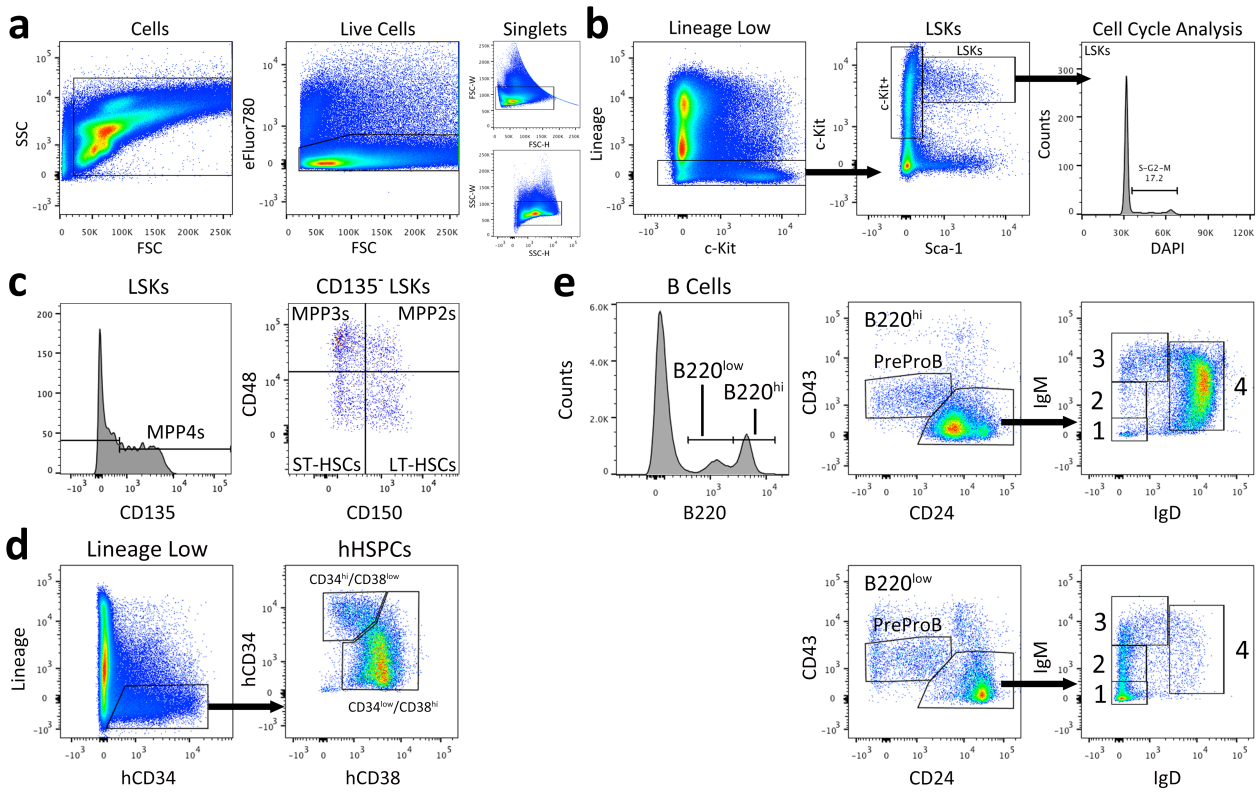

**Supplementary Figure 1.** Supplemental data demonstrating flow cytometry panels. **a)** All flow cytometry panels identified live single cells using eFluor780 fixable viability dye or DAPI and forward/side scatter properties. **b)** Gating strategy to detect LSK and c-Kit<sup>+</sup> cells from C57BL/6 mouse bone marrow and spleen in Figs. 1d-f; 2b-i; 3d,e; 6f-g. Live HSPCs were gated based on low expression of mature hematopoietic lineage markers and single positive for c-Kit (c-Kit<sup>+</sup> cells) or double positive for c-Kit and Sca-1 (LSK cells). DNA content analysis with DAPI reveals cells in S-G2-M phases of the cell cycle, indicating proliferation. **c)** Gating strategy to identify LSK subsets, including MPP4s (CD135<sup>+</sup>), MPP3s (CD135<sup>-</sup>/48<sup>+</sup>/150<sup>-</sup>), MPP2s (CD135<sup>-</sup>/48<sup>+</sup>/150<sup>+</sup>), ST-HSCs (CD135<sup>-</sup>/48<sup>-</sup>/150<sup>-</sup>), and LT-HSCs (CD135<sup>-</sup>/48<sup>-</sup>/150<sup>+</sup>) in Fig. 2. **d)** Gating strategy to identify hCD34<sup>hi</sup>/hCD38<sup>low</sup> human HSPCs using fluorescently labeled human lineage, CD34, and CD38 antibodies in Fig. 3d. **e)** Gating strategy identifying immature (B220<sup>low</sup>) and mature (B220<sup>hi</sup>) B cell populations in bone marrow related to Fig. 5c-e. After isolating PreProB cells (CD43<sup>+</sup>/CD24<sup>low</sup>), B220<sup>hi</sup> bone marrow B cells were confirmed to be enriched for IgM<sup>+</sup> transitional (subset 3) and IgM<sup>+</sup>/IgD<sup>+</sup> mature (subset 4) B cells. B220<sup>low</sup> bone marrow B cells were enriched for IgM<sup>-</sup> ProB and PreB (subset 1) and IgM<sup>low</sup> immature (subset 2) B cells.

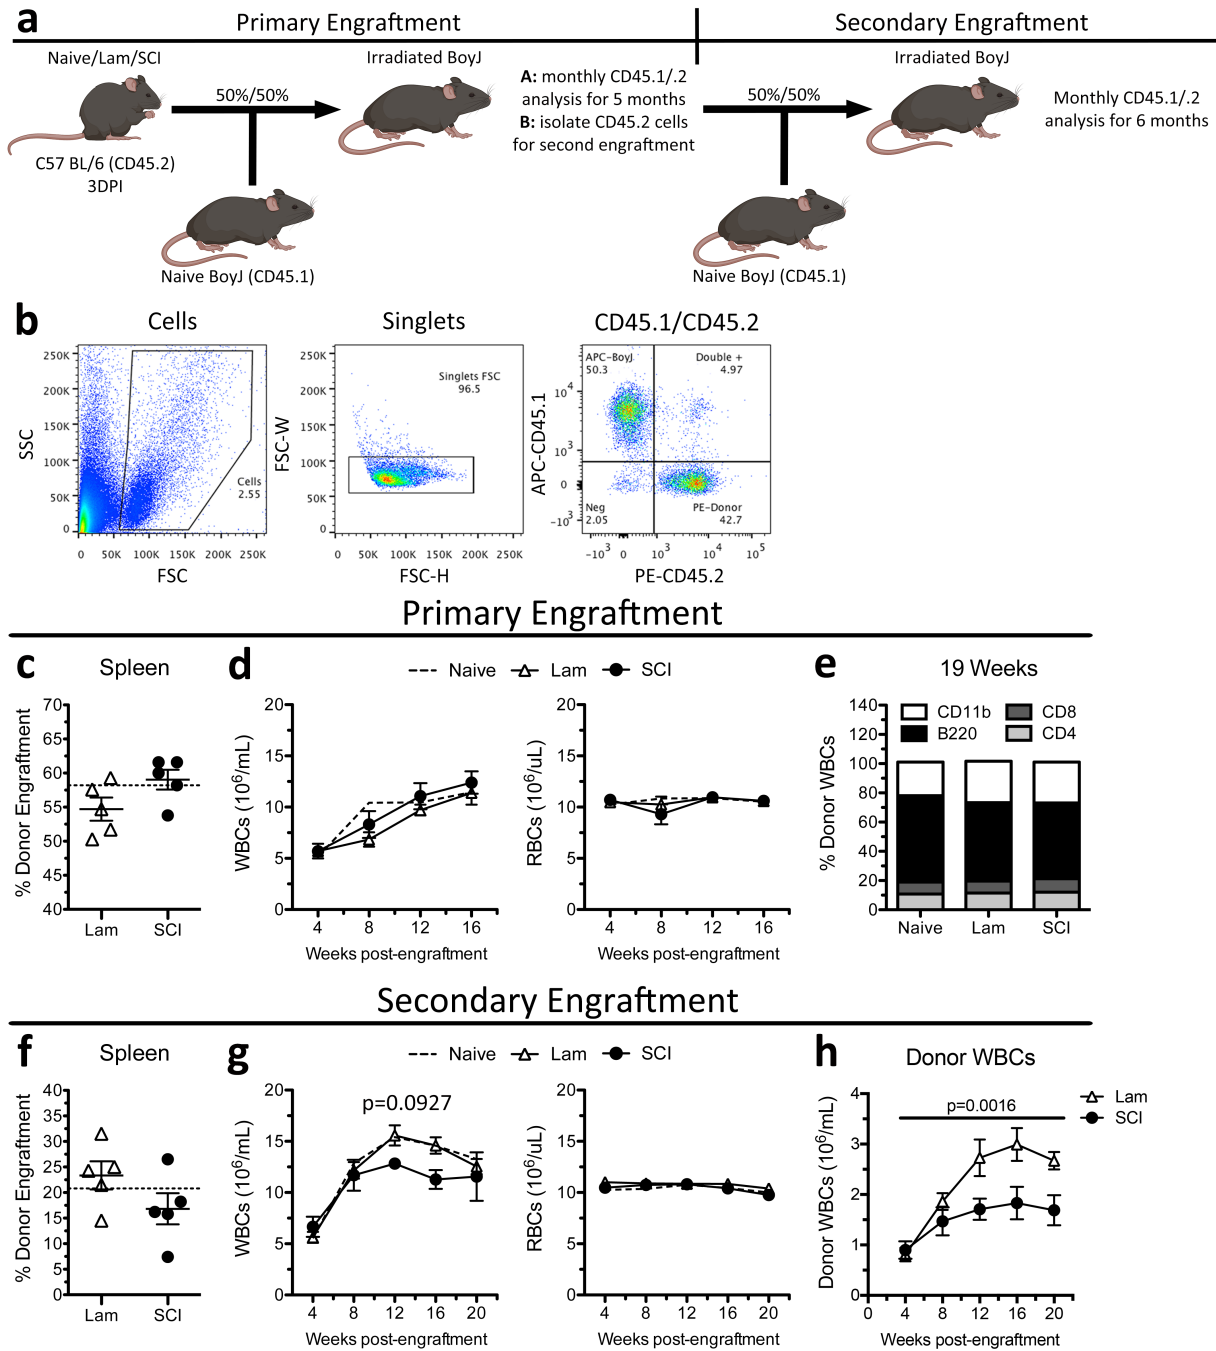

**Supplementary Figure 2.** Supplemental data for competitive repopulating unit (CRU) experiments. **a**) CRU assay experimental design. **b**) flow cytometry gating strategy to identify single cells labeled with CD45.2 (from donor mouse groups) or CD45.1 (from BoyJ mice). **c**) Percent donor engraftment in spleen 19 weeks after primary transplantation. **d**) Total white blood cell (WBC) and red blood cell (RBC) counts from 4-16 weeks after primary transplantation. **e**) Composition of donor (C57 BL/6, CD45.2) WBCs 19 weeks after transplantation. **f**) Percent donor engraftment in spleen 25 weeks after secondary transplantation. **g**) Total white blood cell (WBC) and red blood cell (RBC) counts from 4-20 weeks after secondary transplantation. **h**) Total numbers of donor WBCs from 4-20 weeks after secondary transplantation. All data are mean  $\pm$  SEM, 2-way ANOVA with repeated measures (d,g,h) and 2-sample t-test (c,e,f); n=5/group in c-h. Dotted lines represent averaged data from BoyJ mice transplanted with naive C57 BL/6 bone marrow; Lam = laminectomy (sham-injury). Source data are provided as a Source Data file.

**Supplementary Table 1. Primers for RT-qPCR**

| <b>Gene Product</b> | <b>Forward Primer 5' to 3'</b> | <b>Reverse Primer 5' to 3'</b> |
|---------------------|--------------------------------|--------------------------------|
| IL1 $\beta$         | CAGGCTCCGAGATGAACAAC           | GGTGGAGAGCTTTCAGCTCATAT        |
| TNF $\alpha$        | GTGATCGGTCCCCAAAGG             | GGTCTGGGCCATAGAACTGATG         |
| TGF $\beta$         | TGAGTGGCTGTCTTTTGACGTC         | TTCATGTCATGGATGGTGCC           |
| CXCR4               | TTACCCCGATAGCCTGTGGA           | CAGGAGAGGATGACGATGCC           |
| CXCL12              | CAGACAAGTGTGTGCATTGACCC        | CCTTTGGGCTGTTGTGCATTAC         |
| CCL2                | AACCTGGATCGGAACCAAATG          | AAGTGCTTGAGGTGGTTGTGG          |
| 18S                 | TTCGGAAGTGAAGCCATGAT           | TTTCGCTCTGGTCCGTCTTG           |
